# Supplementary material for: The histone methyltransferase SUV420H2 and Heterochromatin Proteins HP1 interact but show different dynamic behaviours
Source: Springer Nature journal article supplement (doi:10.1186/1471-2121-10-41), 2009-06-01
Supplement: Additional file 1 [file 1471-2121-10-41-s1.pdf]

## List of proteins identified with SUV420H2

TAP bait is indicated in bold

| Accession          | Description                                                                                     | Protein Score | Number of Peptides |
|--------------------|-------------------------------------------------------------------------------------------------|---------------|--------------------|
| 5HT7R_HUMAN        | 5-hydroxytryptamine receptor 7                                                                  | 39            | 3                  |
| A26CA_HUMAN        | ANKRD26-like family C member 1A - Homo sapiens (Human)                                          | 155           | 4                  |
| ACTB_HUMAN         | Actin, cytoplasmic 1 - Homo sapiens (Human)                                                     | 534           | 17                 |
| ACTBL_HUMAN        | Protein beta-actin-like - Homo sapiens (Human)                                                  | 136           | 7                  |
| ACTC_HUMAN         | Actin, alpha cardiac muscle 1 - Homo sapiens (Human)                                            | 326           | 16                 |
| ADT2_HUMAN         | ADP/ATP translocase 2 - Homo sapiens (Human)                                                    | 45            | 1                  |
| CALM_HUMAN         | Calmodulin - Homo sapiens (Human)                                                               | 101           | 3                  |
| CBX3_HUMAN         | Chromobox protein homolog 3 - Homo sapiens (Human)                                              | 422           | 20                 |
| CBX5_HUMAN         | Chromobox protein homolog 5 - Homo sapiens (Human)                                              | 46            | 3                  |
| CH60_HUMAN         | 60 kDa heat shock protein, mitochondrial precursor - Homo sapiens (Human)                       | 132           | 3                  |
| CPNS1_HUMAN        | Calpain small subunit 1 - Homo sapiens (Human)                                                  | 160           | 8                  |
| DHX9_HUMAN         | ATP-dependent RNA helicase A - Homo sapiens (Human)                                             | 42            | 1                  |
| DNJA1_HUMAN        | DnaJ homolog subfamily A member 1 - Homo sapiens (Human)                                        | 132           | 2                  |
| DYH12_HUMAN        | Dynein heavy chain 12, axonemal                                                                 | 38            | 2                  |
| EF1A1_HUMAN        | Elongation factor 1-alpha 1 - Homo sapiens (Human)                                              | 160           | 4                  |
| EFU_HUMAN          | Elongation factor Tu, mitochondrial precursor - Homo sapiens (Human)                            | 276           | 4                  |
| GRP78_HUMAN        | 78 kDa glucose-regulated protein precursor - Homo sapiens (Human)                               | 398           | 6                  |
| GTF2I_HUMAN        | General transcription factor II-I - Homo sapiens (Human)                                        | 85            | 1                  |
| H2A1D_HUMAN        | Histone H2A type 1-D - Homo sapiens (Human)                                                     | 126           | 4                  |
| H2B1C_HUMAN        | Histone H2B type 1-C/E/F/G/I - Homo sapiens (Human)                                             | 123           | 3                  |
| H31T_HUMAN         | Histone H3.1t - Homo sapiens (Human)                                                            | 134           | 8                  |
| H4_HUMAN           | Histone H4 - Homo sapiens (Human)                                                               | 152           | 7                  |
| HNRL2_HUMAN        | Heterogeneous nuclear ribonucleoprotein U-like protein 2 - Homo sapiens (Human)                 | 67            | 1                  |
| HNRP1_HUMAN        | Heterogeneous nuclear ribonucleoprotein U - Homo sapiens (Human)                                | 136           | 2                  |
| HS90A_HUMAN        | Heat shock protein HSP 90-alpha - Homo sapiens (Human)                                          | 55            | 1                  |
| HS90B_HUMAN        | Heat shock protein HSP 90-beta - Homo sapiens (Human)                                           | 69            | 1                  |
| HSPT7C_HUMAN       | Heat shock cognate 71 kDa protein - Homo sapiens (Human)                                        | 408           | 6                  |
| IQGA1_HUMAN        | Ras GTPase-activating-like protein IQGAP1 - Homo sapiens (Human)                                | 70            | 1                  |
| K1967_HUMAN        | Protein KIAA1967 - Homo sapiens (Human)                                                         | 83            | 2                  |
| K6PP_HUMAN         | 6-phosphofructokinase type C - Homo sapiens (Human)                                             | 220           | 4                  |
| KU70_HUMAN         | ATP-dependent DNA helicase 2 subunit 1 - Homo sapiens (Human)                                   | 51            | 1                  |
| KU86_HUMAN         | ATP-dependent DNA helicase 2 subunit 2 - Homo sapiens (Human)                                   | 71            | 1                  |
| LHX1_HUMAN         | LIM/homeobox protein Lhx1 - Homo sapiens (Human)                                                | 41            | 2                  |
| MATR3_HUMAN        | Matrin-3 - Homo sapiens (Human)                                                                 | 120           | 4                  |
| MCM7_HUMAN         | DNA replication licensing factor MCM7 - Homo sapiens (Human)                                    | 145           | 3                  |
| MFAP4_HUMAN        | Microfibril-associated glycoprotein 4 precursor - Homo sapiens (Human)                          | 75            | 3                  |
| MPCP_HUMAN         | Phosphate carrier protein, mitochondrial precursor - Homo sapiens (Human)                       | 44            | 1                  |
| MYH14_HUMAN        | Myosin-14                                                                                       | 68            | 1                  |
| MYH9_HUMAN         | Myosin-9 - Homo sapiens (Human)                                                                 | 589           | 10                 |
| MYLK2_HUMAN        | Myosin light chain kinase 2, skeletal/cardiac muscle - Homo sapiens (Human)                     | 70            | 6                  |
| OFD1_HUMAN         | Oral-facial-digital syndrome 1 protein                                                          | 40            | 2                  |
| PP1A_HUMAN         | Serine/threonine-protein phosphatase PP1-alpha catalytic subunit - Homo sapiens (Human)         | 58            | 1                  |
| PYR1_HUMAN         | CAD protein [Includes: Glutamine-dependent carbamoyl-phosphate synthase - Homo sapiens (Human)] | 202           | 4                  |
| RL11_HUMAN         | 60S ribosomal protein L11 - Homo sapiens (Human)                                                | 82            | 1                  |
| RL12_HUMAN         | 60S ribosomal protein L12 - Homo sapiens (Human)                                                | 68            | 1                  |
| RL23_HUMAN         | 60S ribosomal protein L23 - Homo sapiens (Human)                                                | 84            | 1                  |
| RL23A_HUMAN        | 60S ribosomal protein L23a - Homo sapiens (Human)                                               | 80            | 1                  |
| RL27A_HUMAN        | 60S ribosomal protein L27a - Homo sapiens (Human)                                               | 76            | 2                  |
| RL30_HUMAN         | 60S ribosomal protein L30 - Homo sapiens (Human)                                                | 58            | 1                  |
| RLA0_HUMAN         | 60S acidic ribosomal protein P0 - Homo sapiens (Human)                                          | 104           | 3                  |
| RLA1_HUMAN         | 60S acidic ribosomal protein P1 - Homo sapiens (Human)                                          | 58            | 1                  |
| RS11_HUMAN         | 40S ribosomal protein S11 - Homo sapiens (Human)                                                | 83            | 2                  |
| RS13_HUMAN         | 40S ribosomal protein S13 - Homo sapiens (Human)                                                | 75            | 2                  |
| RS15A_HUMAN        | 40S ribosomal protein S15a - Homo sapiens (Human)                                               | 48            | 2                  |
| RS17_HUMAN         | 40S ribosomal protein S17 - Homo sapiens (Human)                                                | 65            | 1                  |
| RS18_HUMAN         | 40S ribosomal protein S18 - Homo sapiens (Human)                                                | 78            | 2                  |
| RS25_HUMAN         | 40S ribosomal protein S25 - Homo sapiens (Human)                                                | 50            | 2                  |
| RS3_HUMAN          | 40S ribosomal protein S3 - Homo sapiens (Human)                                                 | 333           | 7                  |
| RS3A_HUMAN         | 40S ribosomal protein S3a - Homo sapiens (Human)                                                | 49            | 1                  |
| RS4Y1_HUMAN        | 40S ribosomal protein S4, Y isoform 1 - Homo sapiens (Human)                                    | 56            | 1                  |
| RS5_HUMAN          | 40S ribosomal protein S5 - Homo sapiens (Human)                                                 | 62            | 1                  |
| S10A2_HUMAN        | Protein S100-A2 - Homo sapiens (Human)                                                          | 86            | 3                  |
| SFPQ_HUMAN         | Splicing factor, proline- and glutamine-rich - Homo sapiens (Human)                             | 70            | 1                  |
| SP16H_HUMAN        | FACT complex subunit SPT16 - Homo sapiens (Human)                                               | 68            | 1                  |
| SPG7_HUMAN         | Paraplegin - Homo sapiens (Human)                                                               | 41            | 2                  |
| SPTA2_HUMAN        | Spectrin alpha chain, brain - Homo sapiens (Human)                                              | 95            | 2                  |
| SSB_HUMAN          | Single-stranded DNA-binding protein, mitochondrial precursor - Homo sapiens (Human)             | 68            | 1                  |
| <b>SUV42_HUMAN</b> | <b>Histone-lysine N-methyltransferase SUV420H2 - Homo sapiens (Human)</b>                       | <b>587</b>    | <b>20</b>          |
| TBA1A_HUMAN        | Tubulin alpha-1A chain - Homo sapiens (Human)                                                   | 61            | 2                  |
| TBA1B_HUMAN        | Tubulin alpha-1B chain - Homo sapiens (Human)                                                   | 679           | 16                 |
| TBA1C_HUMAN        | Tubulin alpha-1C chain - Homo sapiens (Human)                                                   | 512           | 23                 |
| TBA4A_HUMAN        | Tubulin alpha-4A chain - Homo sapiens (Human)                                                   | 656           | 16                 |
| TBA8_HUMAN         | Tubulin alpha-8 chain - Homo sapiens (Human)                                                    | 306           | 8                  |
| TBB1_HUMAN         | Tubulin beta-1 chain - Homo sapiens (Human)                                                     | 211           | 11                 |
| TBB2A_HUMAN        | Tubulin beta-2A chain - Homo sapiens (Human)                                                    | 896           | 26                 |
| TBB2C_HUMAN        | Tubulin beta-2C chain - Homo sapiens (Human)                                                    | 1114          | 31                 |
| TBB3_HUMAN         | Tubulin beta-3 chain - Homo sapiens (Human)                                                     | 650           | 23                 |
| TBB4_HUMAN         | Tubulin beta-4 chain - Homo sapiens (Human)                                                     | 855           | 23                 |
| TBB5_HUMAN         | Tubulin beta chain - Homo sapiens (Human)                                                       | 1082          | 43                 |
| TBB6_HUMAN         | Tubulin beta-6 chain - Homo sapiens (Human)                                                     | 291           | 11                 |
| TNKS1_HUMAN        | Tankyrase-1                                                                                     | 40            | 2                  |
| WBP4_HUMAN         | WW domain-binding protein 4 - Homo sapiens (Human)                                              | 41            | 3                  |
